# Supplementary material for: WDR92 is required for axonemal dynein heavy chain stability in cytoplasm
Source: PubMed Central journal article supplement — Mol Biol Cell. 2019 Jul 15;30(15):1834–45. doi: 10.1091/mbc.E19-03-0139 (PMC6727741; doi:10.1091/mbc.e19-03-0139), 2019-07-15
Supplement: mbc-30-1834-s001.pdf [file mbc-30-1834-s001.pdf]

# Supplemental Materials

*Molecular Biology of the Cell*

Patel-King et al.

## Supplementary Figure Legends

### Supplementary Figure S1 Transcriptomic Profiles of Dynein Components and Assembly Factors

Diurnal transcriptomic profiles for individual dynein components and assembly factors are shown. The profiles show three basic patterns of expression and are arranged as Groups I-III. The original data are from (Zones *et al.*, 2015). RPKM; reads per kilobase per million mapped reads.

### Supplementary Figure S2 *wdr92-1 tpg1-2* Cilia Lack Rigidity

Differential interference contrast images of *pf18* and *wdr92-1 tpg1-2* cells. The *pf18* cilia lack the central pair complex, have dyneins in a pre-power stroke force-balanced state (Lin and Nicastro, 2018), and are rigid. In contrast, *wdr92-1 tpg1-2* cilia adopt varying conformations and appear flaccid or “floppy” as the cells float around. In the *lower panel*, cilia images from multiple cells were aligned at the base and overlaid using Adobe Photoshop to illustrate this conformational variation. Bar = 5  $\mu\text{m}$ .

## Group I

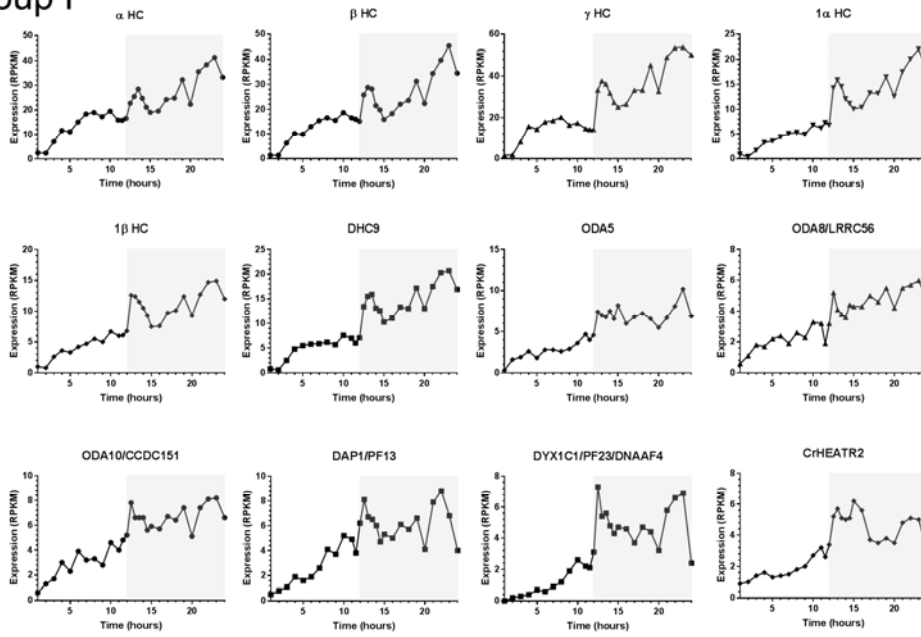

## Group II

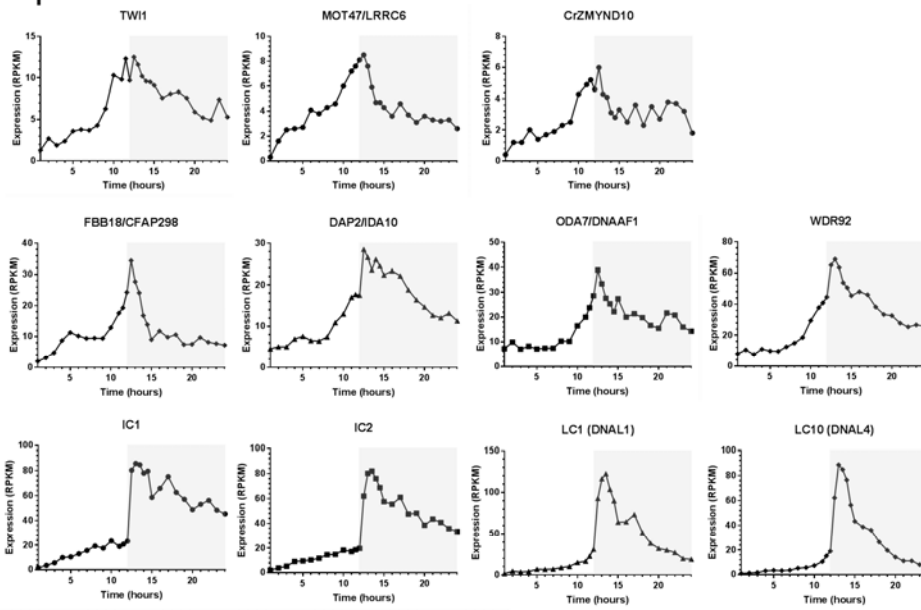

## Group III

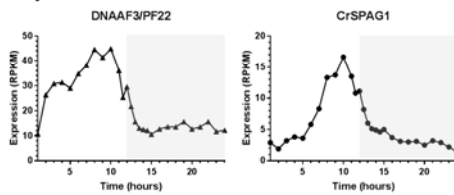

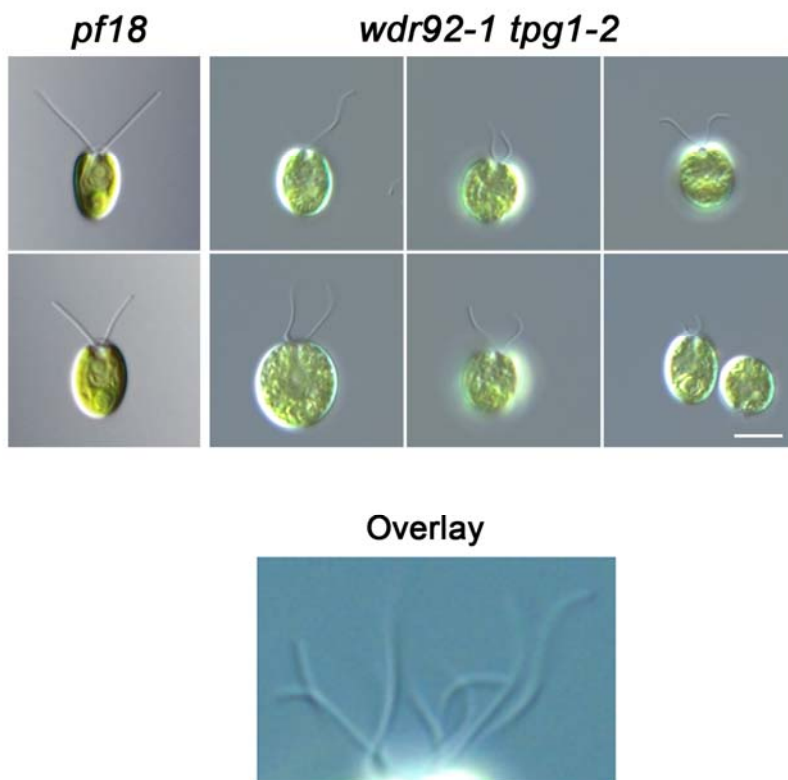

Patel-King *et al.* Supplementary Figure S2

## Supplementary Table 1

### Oligonucleotides Used in this Study

| <b>Designation</b> | <b>Sequence</b>      | <b>Source</b>                          |
|--------------------|----------------------|----------------------------------------|
| SK962              | GCACCAATCATGTCAAGCCT | C1B1 resistance cassette               |
| SK963              | GACGTTACAGCACACCCTTG | C1B1 resistance cassette               |
| SK971              | GGCTTGTGTGGCTGGTATTT | <i>WDR92</i> upstream forward primer   |
| SK972              | TACGAGCTAGAAGGACCGGA | <i>WDR92</i> downstream reverse primer |

## Supplementary Table 2

### Antibodies Used in this Study

| Antibody           | Target Protein                                                    | Source and Type      | Reference |
|--------------------|-------------------------------------------------------------------|----------------------|-----------|
| 18 $\alpha$ B      | Outer arm dynein $\alpha$ heavy chain ( $\alpha$ HC)              | Mouse monoclonal IgG | 1,2       |
| 18 $\beta$ C       | Outer arm dynein $\beta$ heavy chain ( $\beta$ HC)                | Mouse monoclonal IgG | 1,2       |
| 12 $\gamma$ B      | Outer arm dynein $\gamma$ heavy chain ( $\gamma$ HC)              | Mouse monoclonal IgG | 1,2       |
| 1878A              | Outer arm dynein intermediate chain 1 (IC1 <i>aka</i> IC78, IC80) | Mouse monoclonal IgG | 1,2       |
| 1869A              | Outer arm dynein intermediate chain 2 (IC2 <i>aka</i> IC69, IC70) | Mouse monoclonal IgG | 1,2       |
| R5932              | Outer arm dynein light chain 1 (LC1)                              | Rabbit polyclonal    | 3         |
| CT248              | IFT dynein intermediate chain 2 (D1bIC2 <i>aka</i> FAP133, WDR34) | Rabbit polyclonal    | 4         |
| CT295              | IFT dynein intermediate chain 1 (D1bIC1 <i>aka</i> FAP163, WDR60) | Rabbit polyclonal    | 5         |
| CT299              | DYX1C1 (PF23) dynein assembly factor                              | Rabbit polyclonal    | 6         |
| $\alpha$ -DHC1b    | DHC1b - IFT dynein heavy chain                                    | Rabbit polyclonal    | 7         |
| $\alpha$ -IFT72/74 | IFT72/74 (IFT-B component)                                        | Rabbit polyclonal    | 8         |
| $\alpha$ -IFT139   | IFT139 (IFT-A component)                                          | Mouse monoclonal IgG | 9         |

### References

1. King, S.M., Otter, T., and Witman, G.B. (1985). Characterization of monoclonal antibodies against *Chlamydomonas* flagellar dyneins by high resolution protein blotting. **Proceedings of the National Academy of Sciences USA**82, 4717-4721.
2. King, S.M., Otter, T. and Witman, G.B. (1986). Purification and characterization of *Chlamydomonas* flagellar dyneins. **Methods in Enzymology**134, 291-306.
3. Benashski, S.E. Patel-King, R.S. & King, S.M. (1999). Light chain 1 from the *Chlamydomonas* outer dynein arm is a leucine-rich repeat protein associated with the motor domain of the  $\gamma$  heavy chain. **Biochemistry**38, 7253-7264.
4. Rompolas, P., Pedersen, L.B., Patel-King, R.S. & King, S.M. (2007) *Chlamydomonas* FAP133 is a dynein intermediate chain associated with the retrograde intraflagellar transport motor. **Journal of Cell Science**120, 3653-3665.
5. Patel-King, R.S., Gilberti, R.M., Hom, E.F.Y. and King, S.M. (2013) WD60/FAP163 is a dynein intermediate chain required for retrograde intraflagellar transport in cilia. **Molecular Biology of the Cell**24, 2668-2677.

6. Yamamoto, R., Obbineni, J.M., Alford, L.M., Ide, T., Owa, M., Kon, T., Inaba, K., James, N., King, S.M., Ishikawa, T., Sale, W.S., and Dutcher, S.K. (2017). *Chlamydomonas* DYX1C1/PF23 is essential for axonemal assembly and proper morphology of inner dynein arms. **PLoS Genetics** 13(9): e1006996.
7. Pazour, G.J., Dickert, B.L., and Witman, G.B. (1999). The DHC1b (DHC2) isoform of cytoplasmic dynein is required for flagellar assembly. **Journal of Cell Biology** 144, 473-481.
8. Qin, H., Diener, D.R., Geimer, S., Cole, D.G., and Rosenbaum, J.L. (2004). Intraflagellar transport (IFT) cargo. **Journal of Cell Biology** 164, 255-266.
9. Cole, D.G., Diener, D.R., Himelblau, A.L., Beech, P.L., Fuster, J.C., and Rosenbaum, J.L. (1998). *Chlamydomonas* kinesin-II-dependent intraflagellar transport (IFT): IFT particles contain proteins required for ciliary assembly in *Caenorhabditis elegans* sensory neurons. **Journal of Cell Biology** 141, 993-1008.
